# Supplementary material for: Differential Transcriptome Profiling Unveils Novel Deregulated Gene Signatures Involved in Pathogenesis of Alzheimer’s Disease
Source: MDPI journal article supplement (doi:10.3390/biomedicines10030611), 2022-03-06
Supplement: s1 [file s1]

**Supplementary Table 1 (S1).** Details of subjects participated in the study.

| <b>Characteristics of study subjects</b> | <b>Control</b>      | <b>AD</b>        |
|------------------------------------------|---------------------|------------------|
| Number                                   | 8                   | 7                |
| Average Age                              | 85                  | 87.4             |
| Sex                                      | M (n=6) and F (n=2) | M (n=2), F (n=5) |

**Supplementary Table 2 (S2).** Transcriptome expression profiling of significantly altered genes (p<0.001) in the AD. D and U expression levels indicate downregulated and upregulated, respectively.

| Probe Set ID | Gene Symbol | Crtl_Mean | Crtl_SD | AD_Mean | AD_SD | p-Value | Expression Level |
|--------------|-------------|-----------|---------|---------|-------|---------|------------------|
| 1553718_at   | ZNF548      | 4.59      | 0.38    | 3.60    | 0.47  | 9.1E-04 | D                |
| 1555801_s_at | ZNF385B     | 4.23      | 0.50    | 3.19    | 0.42  | 7.5E-04 | D                |
| 1561130_at   | HECTD4      | 2.80      | 0.13    | 2.46    | 0.12  | 1.4E-04 | D                |
| 1563209_a_at | MACROD2     | 5.74      | 0.25    | 5.17    | 0.20  | 3.5E-04 | D                |
| 200623_s_at  | CALM2       | 10.11     | 0.15    | 9.46    | 0.31  | 9.3E-04 | D                |
| 200703_at    | DYNLL1      | 5.96      | 0.25    | 5.32    | 0.30  | 9.3E-04 | D                |
| 200978_at    | MDH1        | 7.46      | 0.29    | 6.56    | 0.42  | 7.1E-04 | D                |
| 201864_at    | GDI1        | 9.89      | 0.12    | 9.62    | 0.12  | 7.7E-04 | D                |
| 203001_s_at  | STMN2       | 7.64      | 0.38    | 6.75    | 0.40  | 8.7E-04 | D                |
| 203527_s_at  | APC         | 3.58      | 0.26    | 2.72    | 0.37  | 3.8E-04 | D                |
| 203797_at    | VSNL1       | 9.39      | 0.44    | 8.58    | 0.25  | 9.0E-04 | D                |
| 204207_s_at  | RNGTT       | 4.39      | 0.22    | 3.95    | 0.16  | 6.2E-04 | D                |
| 204287_at    | SYNGR1      | 5.91      | 0.30    | 5.20    | 0.14  | 1.1E-04 | D                |
| 204338_s_at  | RGS4        | 6.38      | 0.44    | 5.20    | 0.40  | 1.1E-04 | D                |
| 205230_at    | RPH3A       | 6.92      | 0.42    | 5.91    | 0.34  | 2.0E-04 | D                |
| 205352_at    | SERPINI1    | 6.37      | 0.52    | 4.90    | 0.45  | 5.1E-05 | D                |
| 205635_at    | KALRN       | 7.17      | 0.43    | 5.98    | 0.54  | 6.0E-04 | D                |
| 208032_s_at  | GRIA3       | 6.73      | 0.33    | 5.74    | 0.34  | 7.6E-05 | D                |
| 208248_x_at  | APLP2       | 10.14     | 0.13    | 9.79    | 0.15  | 3.6E-04 | D                |
| 208359_s_at  | KCNJ4       | 12.70     | 0.24    | 12.07   | 0.25  | 2.8E-04 | D                |
| 209186_at    | ATP2A2      | 10.94     | 0.16    | 10.47   | 0.22  | 7.1E-04 | D                |
| 209444_at    | RAP1GDS1    | 6.06      | 0.33    | 5.19    | 0.22  | 5.4E-05 | D                |
| 213927_at    | MAP3K9      | 6.56      | 0.26    | 5.80    | 0.35  | 6.1E-04 | D                |
| 214293_at    | SEPT1       | 6.90      | 0.33    | 6.26    | 0.24  | 9.4E-04 | D                |
| 214365_at    | TPM3        | 4.77      | 0.22    | 4.27    | 0.15  | 2.5E-04 | D                |
| 216963_s_at  | GAP43       | 5.29      | 0.20    | 4.50    | 0.23  | 1.0E-05 | D                |
| 216967_at    | GAP43       | 8.27      | 0.30    | 7.44    | 0.34  | 2.8E-04 | D                |
| 217564_s_at  | CPS1        | 3.38      | 0.34    | 2.71    | 0.18  | 4.8E-04 | D                |
| 218716_x_at  | MTO1        | 3.52      | 0.14    | 3.11    | 0.15  | 1.1E-04 | D                |
| 219145_at    | ADGRL1      | 5.61      | 0.21    | 5.03    | 0.27  | 6.3E-04 | D                |
| 219957_at    | RUFY2       | 2.41      | 0.28    | 1.85    | 0.24  | 8.8E-04 | D                |
| 221504_s_at  | ATP6V1H     | 5.47      | 0.33    | 4.68    | 0.30  | 3.4E-04 | D                |
| 222005_s_at  | GNG3        | 7.67      | 0.29    | 6.87    | 0.36  | 5.8E-04 | D                |
| 224311_s_at  | CAB39       | 5.68      | 0.25    | 5.09    | 0.17  | 1.5E-04 | D                |
| 224575_at    | BRK1        | 4.91      | 0.18    | 4.45    | 0.19  | 3.7E-04 | D                |
| 226779_at    | LMBRD2      | 6.58      | 0.34    | 5.76    | 0.29  | 2.1E-04 | D                |
| 228280_at    | ZC3HAV1L    | 2.47      | 0.27    | 1.91    | 0.20  | 5.5E-04 | D                |
| 229770_at    | GLT1D1      | 5.78      | 0.26    | 5.06    | 0.33  | 6.6E-04 | D                |
| 230498_at    | MCHR1       | 4.69      | 0.26    | 4.00    | 0.30  | 4.6E-04 | D                |
| 232857_at    | POLR3H      | 4.91      | 0.18    | 4.50    | 0.17  | 5.8E-04 | D                |
| 236591_at    | MIR4458HG   | 3.36      | 0.40    | 2.52    | 0.35  | 8.1E-04 | D                |
| 238056_at    | SDHC        | 6.55      | 0.22    | 5.94    | 0.20  | 6.6E-05 | D                |
| 241024_at    | KHDC1       | 3.78      | 0.09    | 3.33    | 0.19  | 4.0E-04 | D                |
| 242344_at    | GABRB2      | 8.67      | 0.25    | 8.07    | 0.22  | 2.7E-04 | D                |

|             |          |      |      |      |      |         |   |
|-------------|----------|------|------|------|------|---------|---|
| 202018_s_at | LTF      | 2.81 | 0.28 | 4.05 | 0.44 | 8.2E-05 | U |
| 207055_at   | GPR37L1  | 4.25 | 0.24 | 5.04 | 0.38 | 7.9E-04 | U |
| 209561_at   | THBS3    | 3.44 | 0.21 | 3.94 | 0.22 | 7.2E-04 | U |
| 210749_x_at | DDR1     | 5.32 | 0.23 | 5.87 | 0.20 | 3.1E-04 | U |
| 217799_x_at | UBE2H    | 5.82 | 0.22 | 6.23 | 0.16 | 9.4E-04 | U |
| 220594_at   | OGT      | 4.05 | 0.15 | 4.40 | 0.16 | 8.7E-04 | U |
| 224395_s_at | RNF7     | 4.73 | 0.24 | 5.32 | 0.28 | 9.4E-04 | U |
| 226968_at   | KIF1B    | 6.92 | 0.16 | 7.40 | 0.22 | 6.0E-04 | U |
| 228346_at   | ZNF844   | 2.27 | 0.22 | 2.86 | 0.28 | 8.7E-04 | U |
| 230880_at   | KIAA1652 | 2.46 | 0.23 | 2.88 | 0.11 | 7.9E-04 | U |
| 231002_s_at | RABEP1   | 6.76 | 0.15 | 7.12 | 0.16 | 7.0E-04 | U |
| 231448_at   | ADAD1    | 1.68 | 0.06 | 1.93 | 0.09 | 1.3E-04 | U |
| 233333_x_at | AVIL     | 5.59 | 0.08 | 5.86 | 0.13 | 8.5E-04 | U |
| 238834_at   | MYLK3    | 4.57 | 0.29 | 5.22 | 0.23 | 3.5E-04 | U |

**Supplementary Table 3 (S3):** PEA of DEGs in AD. The pathway annotation information resources are shown as C: CellMap; R: Reactome; K: KEGG; N: NCI PID; P: Panther; B: BioCarta. PEA: Pathway Enrichment Analysis, DEGs: Differentially expressed genes. AD: Alzheimer's disease.

| Pathway<br>(Pathway<br>Resource)                                                                     | Ratio of<br>Protein<br>in Gene<br>Set | Number of<br>Protein in Gene<br>Set | Protein from<br>Network | p-value  | FDR      | Nodes                                              |
|------------------------------------------------------------------------------------------------------|---------------------------------------|-------------------------------------|-------------------------|----------|----------|----------------------------------------------------|
| Huntington<br>disease(P)                                                                             | 0.0124                                | 121                                 | 9                       | 1.03E-07 | 5.17E-05 | ACTB,EP300,RAC1,DYNLL1,HAP1,KALRN,CDC42,ACTC1,DLG4 |
| Signaling events<br>mediated by<br>VEGFR1 and<br>VEGFR2(N)                                           | 0.0065                                | 63                                  | 7                       | 2.11E-07 | 5.17E-05 | NCK2,PRKACA,PRKCB,PXN,CDC42,MAPK14,CALM1           |
| Retrograde<br>endocannabinoid<br>signaling(K)                                                        | 0.0106                                | 103                                 | 8                       | 4.04E-07 | 5.17E-05 | GABRB2,PRKACA,PRKCB,PRKX,GNNG3,GRIA3,MAPK14,GNAQ   |
| Signaling by<br>VEGF(R)                                                                              | 0.0106                                | 103                                 | 8                       | 4.04E-07 | 5.17E-05 | BRK1,NCK2,RAC1,PRKCB,PXN,CDC42,MAPK14,CALM1        |
| Gastric acid<br>secretion(K)                                                                         | 0.0077                                | 75                                  | 7                       | 6.72E-07 | 6.85E-05 | MYLK3,ACTB,PRKACA,PRKCB,PRKX,GNAQ,CALM1            |
| Role of<br>Calcineurin-<br>dependent NFAT<br>signaling in<br>lymphocytes(N)                          | 0.0053                                | 52                                  | 6                       | 1.32E-06 | 1.12E-04 | EP300,PRKACA,YWHAG,PRKCB,MAPK14,CALM1              |
| Dilated<br>cardiomyopathy(K)                                                                         | 0.0092                                | 90                                  | 7                       | 2.23E-06 | 1.31E-04 | ITGB5,ATP2A2,ACTB,PRKACA,TPM3,PRKX,ACTC1           |
| Dopaminergic<br>synapse(K)                                                                           | 0.0134                                | 131                                 | 8                       | 2.39E-06 | 1.31E-04 | PRKACA,PRKCB,PRKX,GNNG3,GRIA3,MAPK14,GNAQ,CALM1    |
| Neurotransmitter<br>receptor binding<br>and downstream<br>transmission<br>in postsynaptic<br>Cell(R) | 0.0135                                | 132                                 | 8                       | 2.53E-06 | 1.31E-04 | GABRB2,PRKCB,GNNG3,AP2S1,GRIA3,KCNJ4,DLG4,CALM1    |
| GnRH signaling<br>pathway(K)                                                                         | 0.0094                                | 92                                  | 7                       | 2.57E-06 | 1.31E-04 | PRKACA,PRKCB,PRKX,CDC42,MAPK14,GNAQ,CALM1          |

|                                                              |        |     |   |          |          |                                                       |
|--------------------------------------------------------------|--------|-----|---|----------|----------|-------------------------------------------------------|
| Parkinson disease(P)                                         | 0.0063 | 61  | 6 | 3.28E-06 | 1.51E-04 | PARK2,YWHAG, GPR37L1,CUL1,SNCA,HSPA5                  |
| Circadian entrainment(K)                                     | 0.0099 | 97  | 7 | 3.63E-06 | 1.53E-04 | PRKACA,PRKCB, PRKX,GNG3,GRI A3,GNAQ,CALM1             |
| Parkinson's disease(K)                                       | 0.0147 | 143 | 8 | 4.54E-06 | 1.77E-04 | PARK2,PRKACA, SDHC,SDHB,PRK X,UBB,SNCA,UBE 2G2        |
| Long-term potentiation(K)                                    | 0.0069 | 67  | 6 | 5.59E-06 | 2.01E-04 | EP300,PRKACA,P RKCB,PRKX,GNA Q,CALM1                  |
| Adrenergic signaling in cardiomyocytes(K)                    | 0.0153 | 149 | 8 | 6.12E-06 | 2.08E-04 | ATP2A2,PRKACA, TPM3,PRKX,MAP K14,ACTC1,GNA Q,CALM1    |
| Proteoglycans in cancer(K)                                   | 0.0209 | 204 | 9 | 7.45E-06 | 2.38E-04 | ITGB5,ACTB,RAC 1,PRKACA,PRKC B,PXN,PRKX,CDC 42,MAPK14 |
| Mitotic G2-G2/M phases(R)                                    | 0.0114 | 111 | 7 | 8.69E-06 | 2.61E-04 | EP300,PRKACA,R AB8A,YWHAG,D YNLL1,CUL1,UBB            |
| Oxytocin signaling pathway(K)                                | 0.0163 | 159 | 8 | 9.77E-06 | 2.74E-04 | MYLK3,ACTB,PR KACA,PRKCB,PR KX,KCNJ4,GNAQ, CALM1      |
| Glutamatergic synapse(K)                                     | 0.0119 | 116 | 7 | 1.15E-05 | 3.00E-04 | PRKACA,PRKCB, PRKX,GNG3,GRI A3,DLG4,GNAQ              |
| Endocrine and other factor-regulated calcium reabsorption(K) | 0.0049 | 48  | 5 | 1.73E-05 | 4.32E-04 | PRKACA,PRKCB, PRKX,AP2S1,GNA Q                        |
| EPH-Ephrin signaling(R)                                      | 0.009  | 88  | 6 | 2.58E-05 | 6.19E-04 | ACTB,NCK2,RAC 1,KALRN,CDC42, AP2S1                    |
| GABAergic synapse(K)                                         | 0.0092 | 90  | 6 | 2.92E-05 | 6.34E-04 | GABRB2,PRKACA ,PRKCB,HAP1,PR KX,GNG3                  |
| Vibrio cholerae infection(K)                                 | 0.0055 | 54  | 5 | 3.02E-05 | 6.34E-04 | ACTB,PRKACA,P RKCB,PRKX,ATP6 V1H                      |
| Thromboxane A2 receptor signaling(N)                         | 0.0055 | 54  | 5 | 3.02E-05 | 6.34E-04 | RAC1,PRKACA,P RKCB,MAPK14,G NAO                       |
| Wntsignaling pathway(K)                                      | 0.0142 | 139 | 7 | 3.64E-05 | 7.27E-04 | EP300,RAC1,PRK ACA,PRKCB,CUL 1,PRKX,APC               |

|                                                     |        |     |   |          |          |                                                    |
|-----------------------------------------------------|--------|-----|---|----------|----------|----------------------------------------------------|
| Huntington's disease(K)                             | 0.0198 | 193 | 8 | 3.87E-05 | 7.35E-04 | EP300,SDHC,SDHB,HAP1,AP2S1,POLR2K,DLG4,GNAQ        |
| Inflammatory mediator regulation of TRP channels(K) | 0.0101 | 99  | 6 | 4.95E-05 | 8.90E-04 | PRKACA,PRKCB,PRKX,MAPK14,GNAQ,CALM1                |
| Epstein-Barr virus infection(K)                     | 0.0207 | 202 | 8 | 5.32E-05 | 9.11E-04 | PSMD7,EP300,PRKACA,YWHAG,PRKX,POLR2K,MAPK14,POLR3H |
| VEGF signaling pathway(K)                           | 0.0063 | 61  | 5 | 5.36E-05 | 9.11E-04 | RAC1,PRKCB,PXN,CDC42,MAPK14                        |
| Melanogenesis(K)                                    | 0.0104 | 101 | 6 | 5.52E-05 | 9.38E-04 | EP300,PRKACA,PRKCB,PRKX,GNAQ,CALM1                 |
